# Supplementary material for: Synthesis and application of 4-[18F]fluorobenzylamine: A versatile building block for the preparation of PET radiotracers
Source: Royal Society of Chemistry journal article supplement (doi:10.1039/c0ob00255k), 2010-01-01
Supplement: c0ob00255k.pdf [file c0ob00255k.pdf]

## **Supplementary information**

### **Synthesis and application of 4-[<sup>18</sup>F]fluorobenzylamine: A versatile building block for the preparation of PET radiotracers**

**Ingrid Koslowsky, John Mercer and Frank Wuest\***

*Department of Oncology, University of Alberta, 11560 University Ave, Edmonton AB T6G 1Z2, Canada. Fax: +1 780 432 8483; Tel: +1 780 989 8150; E-mail: wuest@ualberta.ca*

### **Contents**

HPLC [<sup>18</sup>F]FBAPM

HPLC [<sup>18</sup>F]FBAPM-GSH

HR-MS FBAPM

HR-MS FBAPM-GSH

## HPLC [ $^{18}\text{F}$ ]FBAPM

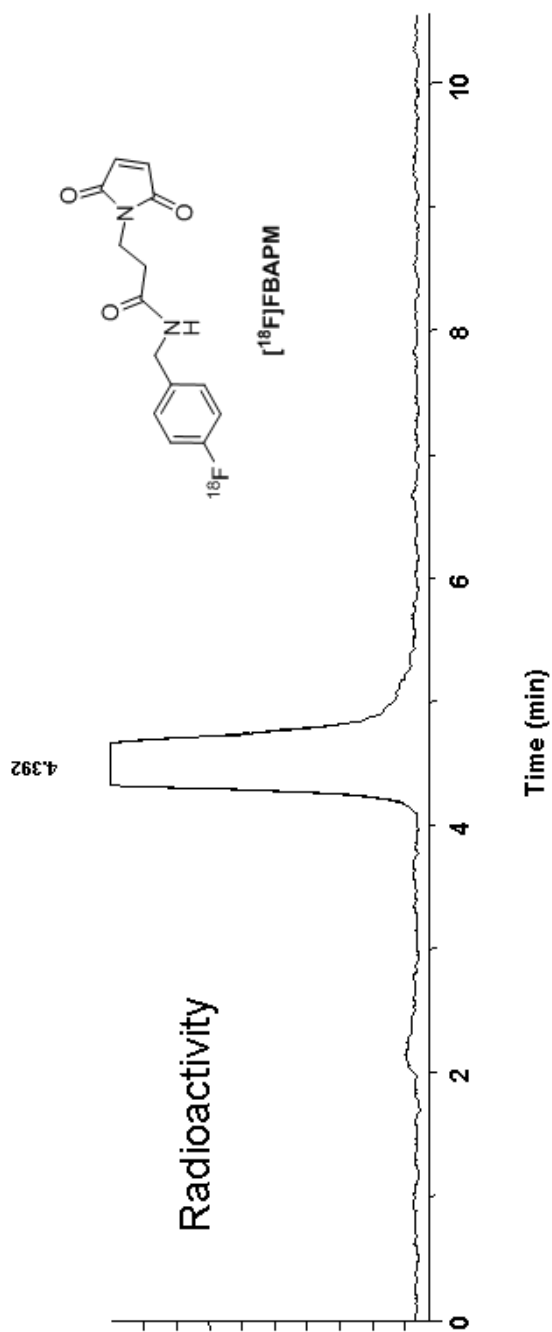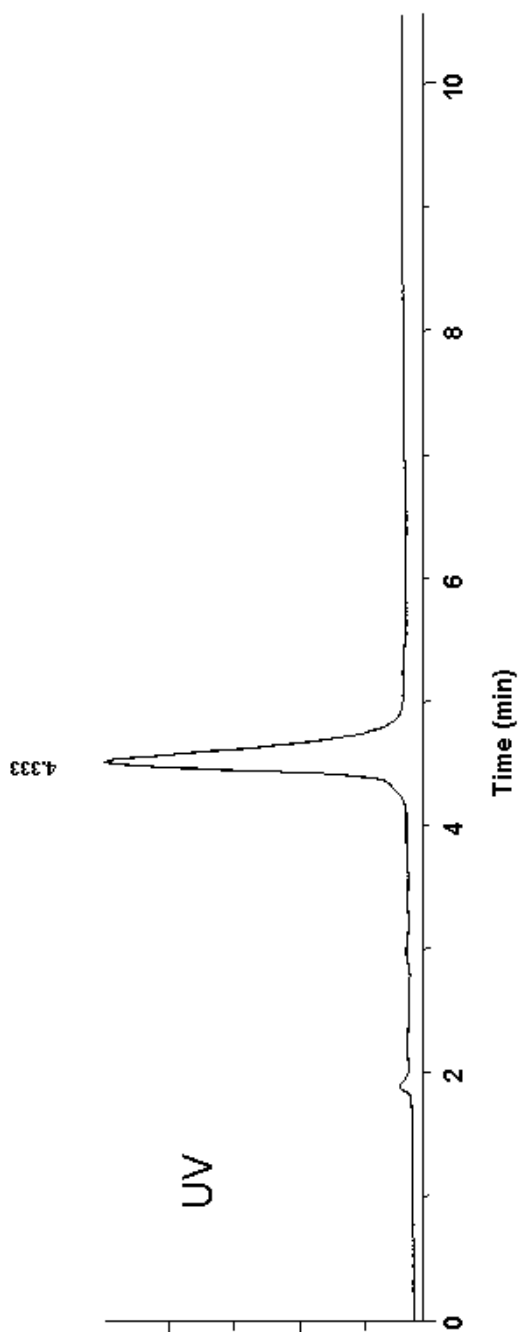

## HPLC [<sup>18</sup>F]FBAPM-GSH

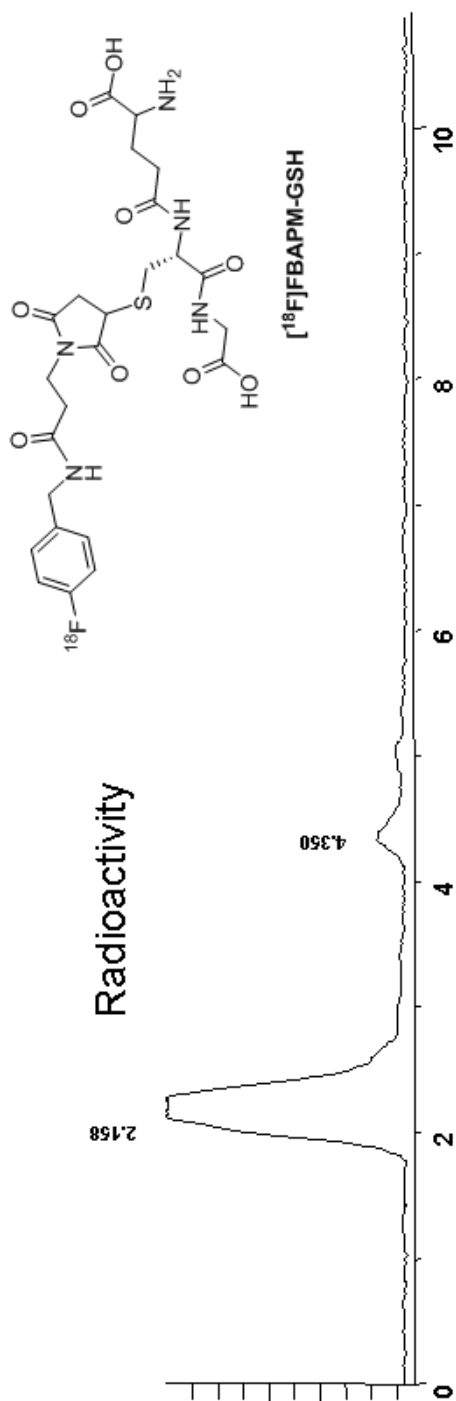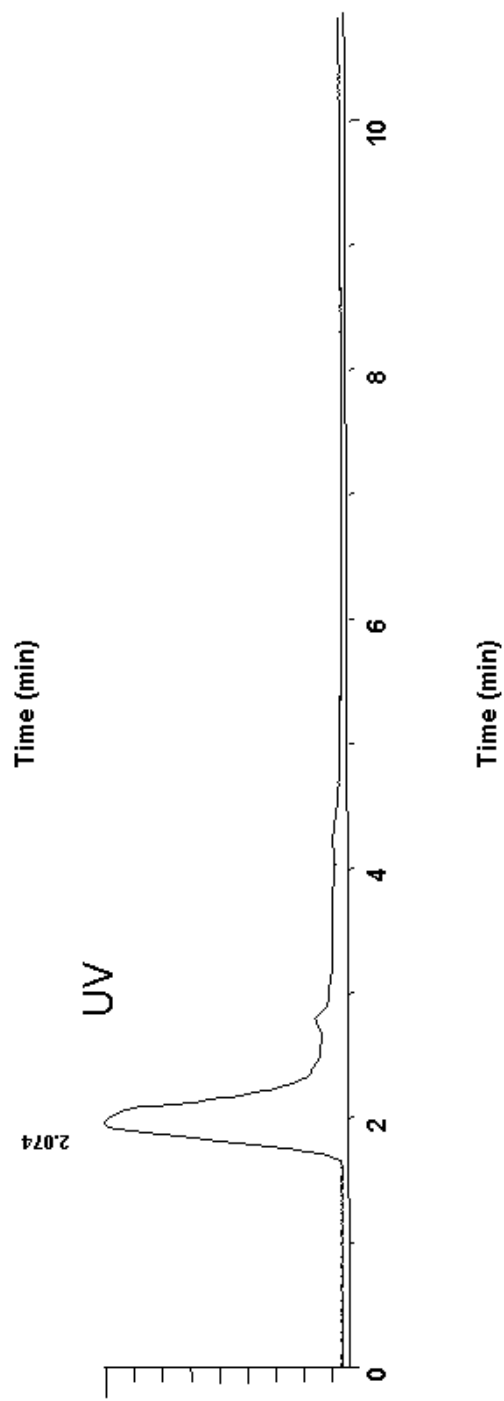

## HR-MS

### 4-Fluorobenzylamidopropionyl maleimide (FBAPM)

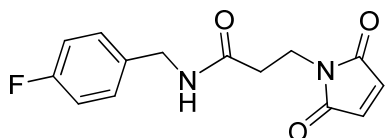

#### Compound Table

#### MS Spectrum

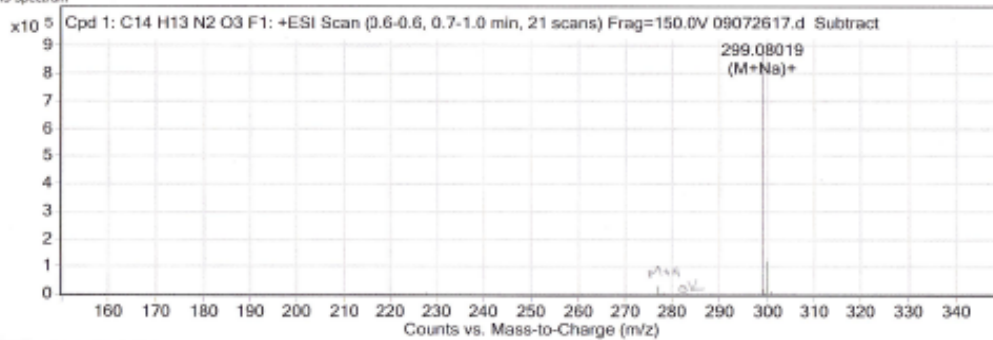

#### MS Spectrum Peak List

| m/z       | Calc m/z  | Diff(ppm) | Abund  | Formula                                                            | Ion                 |
|-----------|-----------|-----------|--------|--------------------------------------------------------------------|---------------------|
| 299.08019 | 299.08024 | -0.18     | 876480 | C <sub>14</sub> H <sub>13</sub> F N <sub>2</sub> Na O <sub>3</sub> | (M+Na) <sup>+</sup> |

--- End Of Report ---

## HR-MS FBAPM-GSH

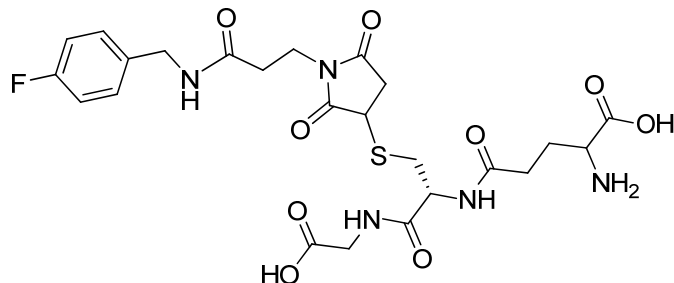

### Compound Table

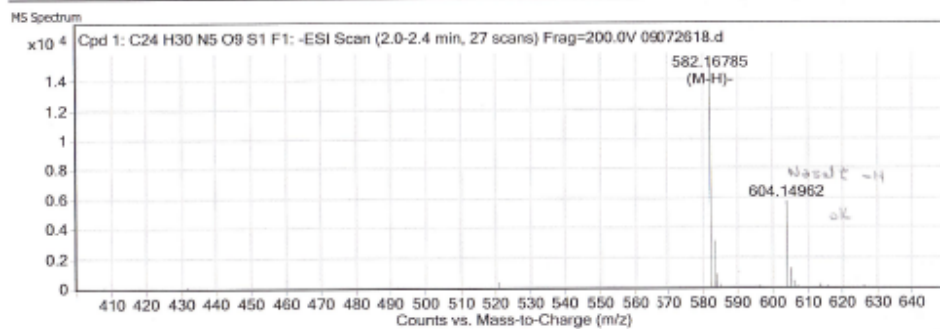

### MS Spectrum Peak List

| m/z       | Calc m/z  | Diff (ppm) | Abund | Formula                                                           | Ion    |
|-----------|-----------|------------|-------|-------------------------------------------------------------------|--------|
| 582.16785 | 582.16755 | 0.52       | 15006 | C <sub>24</sub> H <sub>29</sub> F N <sub>5</sub> O <sub>9</sub> S | (M-H)- |

--- End Of Report ---
